# Supplementary material for: Understanding the role of redox properties and NO adsorption over MnFeOx for NH3-SCR
Source: Royal Society of Chemistry journal article supplement (doi:10.1039/d1cy02203b), 2022-01-01
Supplement: d1cy02203b1.pdf [file d1cy02203b1.pdf]

## **Appendix A. Supplementary data**

### **Understanding the role of redox property and NO adsorption over MnFeO<sub>x</sub> for NH<sub>3</sub>-SCR**

*Qian Xu, Zengyuan Li, Li Wang\*, Wangcheng Zhan, Yanglong Guo, Yun Guo*

Key Laboratory for Advanced Materials and Research Institute of Industrial Catalysis,  
School of Chemistry and Molecular Engineering, East China University of Science  
and Technology, Shanghai, 200237, P. R. China.

\* Corresponding Author: Fax: +86-21-64252923, E-mail: [wangli@ecust.edu.cn](mailto:wangli@ecust.edu.cn) (Li Wang)

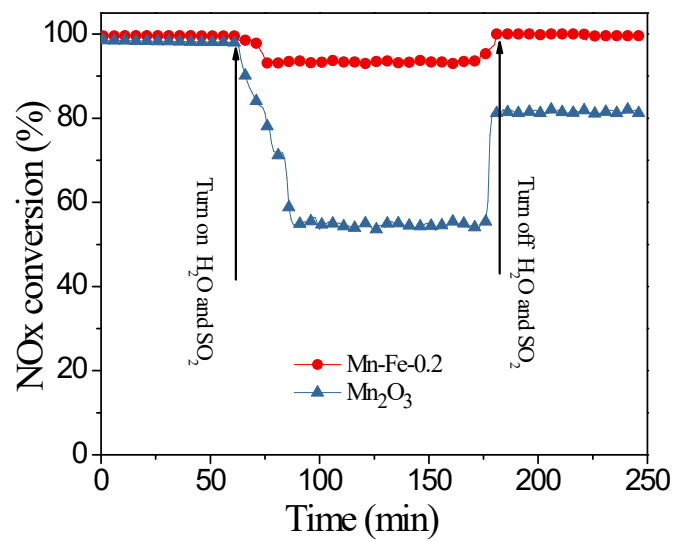

Fig. S1. H<sub>2</sub>O and SO<sub>2</sub> tolerance test of the Mn<sub>2</sub>O<sub>3</sub> and Mn-Fe-0.2 catalysts at 100 °C

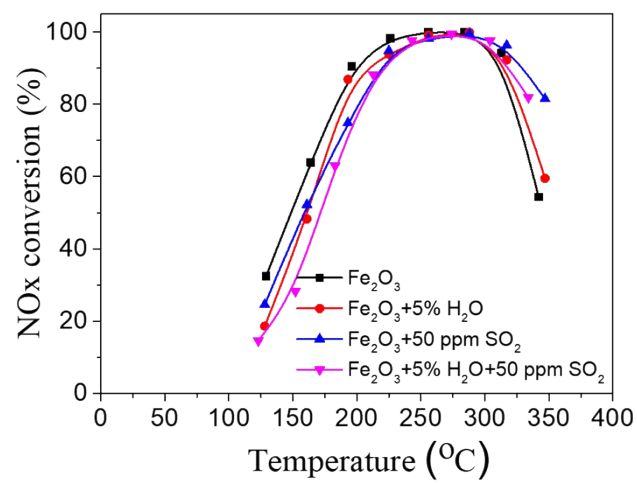

Fig. S2. Effect of H<sub>2</sub>O or/and SO<sub>2</sub> on the activities of Fe<sub>2</sub>O<sub>3</sub>.

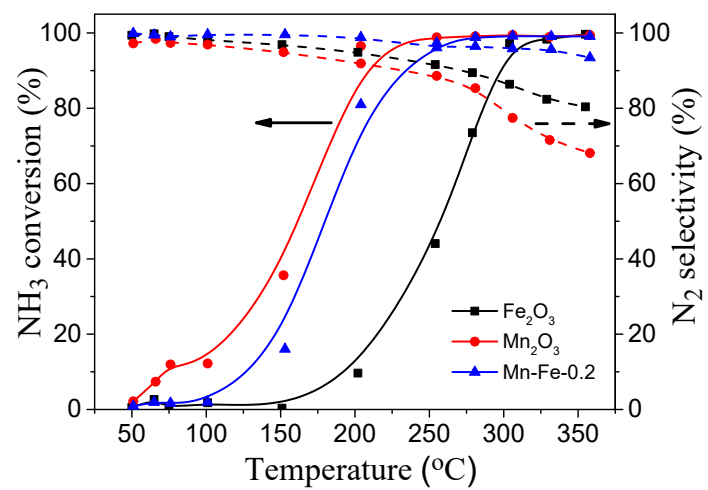

Fig. S3. NH<sub>3</sub> oxidation profiles of Mn<sub>2</sub>O<sub>3</sub>, Fe<sub>2</sub>O<sub>3</sub>, and Mn-Fe-0.2

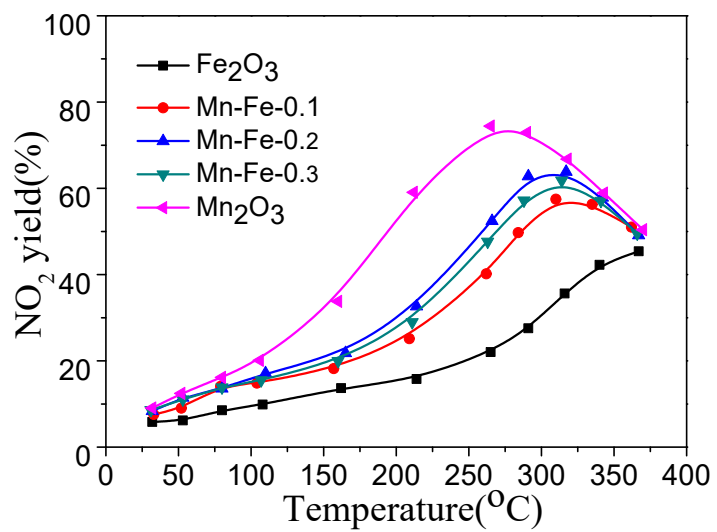

Fig. S4. The NO<sub>2</sub> yield during NO oxidation.

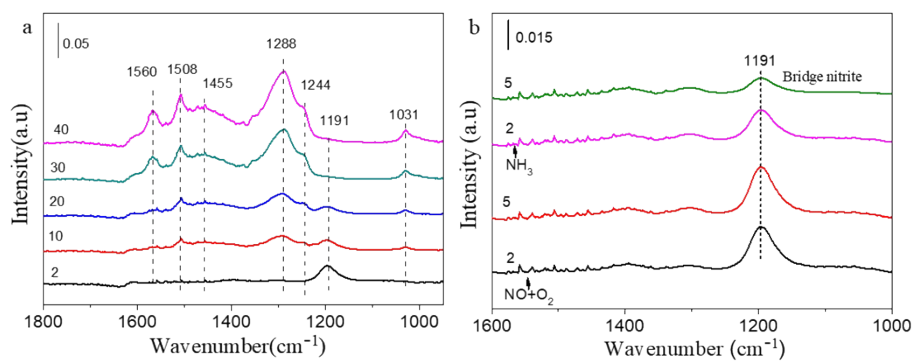

Fig. S5. In situ DRIFT spectra of Mn-Fe-0.2 catalysts exposed to 500 ppm NO + 5 vol % O<sub>2</sub>/Ar (50 mL/min) (a) , and then switched to 500 ppm NH<sub>3</sub>/Ar (50 mL/min) (b) at 50 °C.

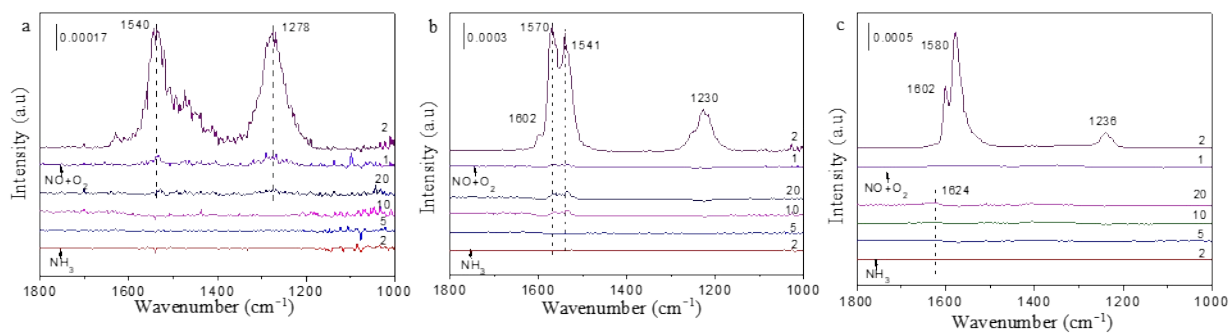

Fig. S6. In situ DRIFT spectra of the Mn<sub>2</sub>O<sub>3</sub> (a), Fe<sub>2</sub>O<sub>3</sub> (b), and Mn-Fe-0.2 (c) catalysts exposed to 500 ppm NH<sub>3</sub>/Ar (50 mL/min), and then switched to 500 ppm NO + 5 vol % O<sub>2</sub>/Ar (50 mL/min) at 300 °C.

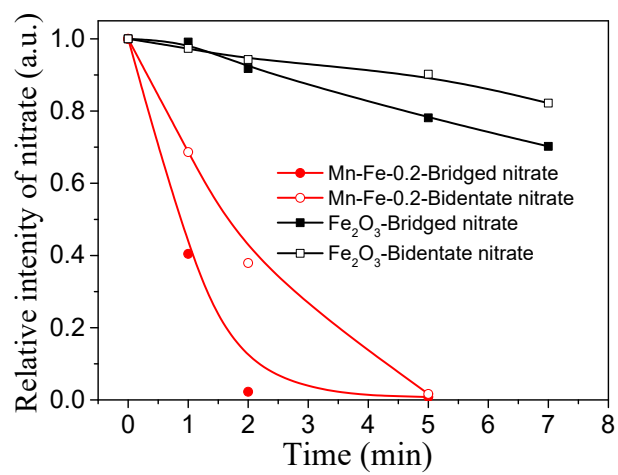

Fig. S7. Relative intensity of nitrate consumption over time on different samples at 300 °C.



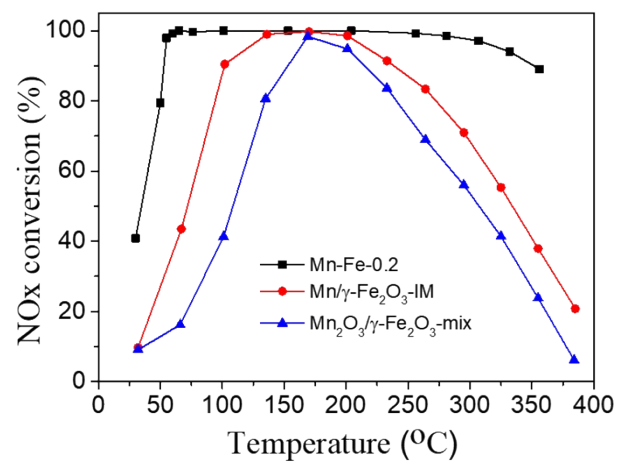

Fig. S8. NO<sub>x</sub> conversion as a function of temperature over MnFe catalysts prepared by different methods.

Table S1. The H<sub>2</sub> consumption amount of the Mn-Fe catalysts.

| Catalyst                       | The practical H <sub>2</sub> consumption amount of $\alpha$ (mmol/g) <sup>a</sup> | The total theoretical H <sub>2</sub> consumption amount (mmol/g) <sup>b</sup> | The difference value between the theoretical and practical H <sub>2</sub> consumption amount (mmol/g) |
|--------------------------------|-----------------------------------------------------------------------------------|-------------------------------------------------------------------------------|-------------------------------------------------------------------------------------------------------|
| Fe <sub>2</sub> O <sub>3</sub> | 1.91                                                                              | 18.80                                                                         | 6.95                                                                                                  |
| Mn-Fe-0.1                      | 2.29                                                                              | 17.56                                                                         | 6.16                                                                                                  |
| Mn-Fe-0.2                      | 2.04                                                                              | 16.63                                                                         | 5.21                                                                                                  |
| Mn-Fe-0.3                      | 2.47                                                                              | 15.78                                                                         | 2.84                                                                                                  |
| Mn <sub>2</sub> O <sub>3</sub> | 2.15                                                                              | 6.33                                                                          | 0.32                                                                                                  |

<sup>a</sup> Calculated via H<sub>2</sub>-TPR results.

<sup>b</sup> Calculated via ICP results.
